# Supplementary material
Source: bioRxiv or medRxiv preprint supplement (https://medrxiv.org/highwire/filestream/94082/field_highwire_adjunct_files/0/2020.08.21.20177857-1.pdf)
Supplement: Supplementary file [file 2020.08.21.20177857-1.pdf]

Supplemental figures

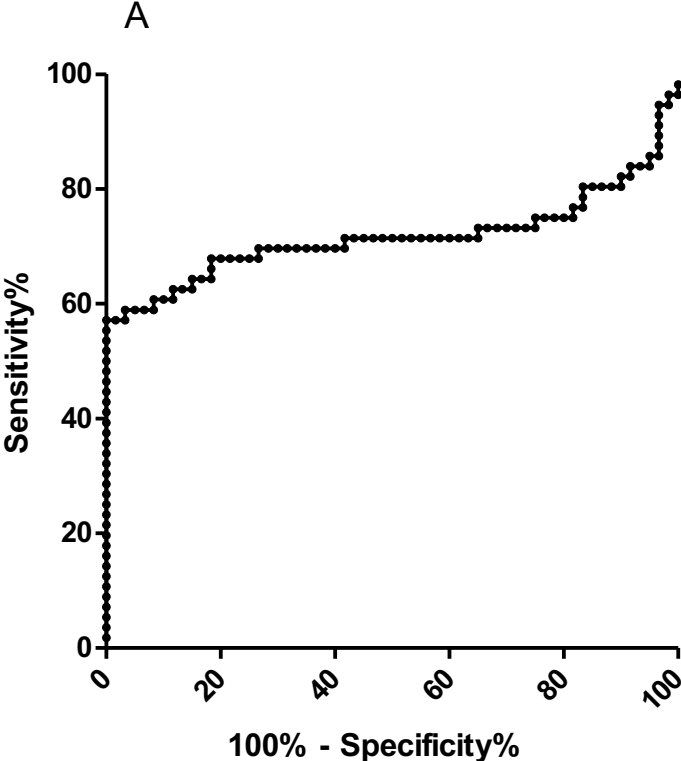

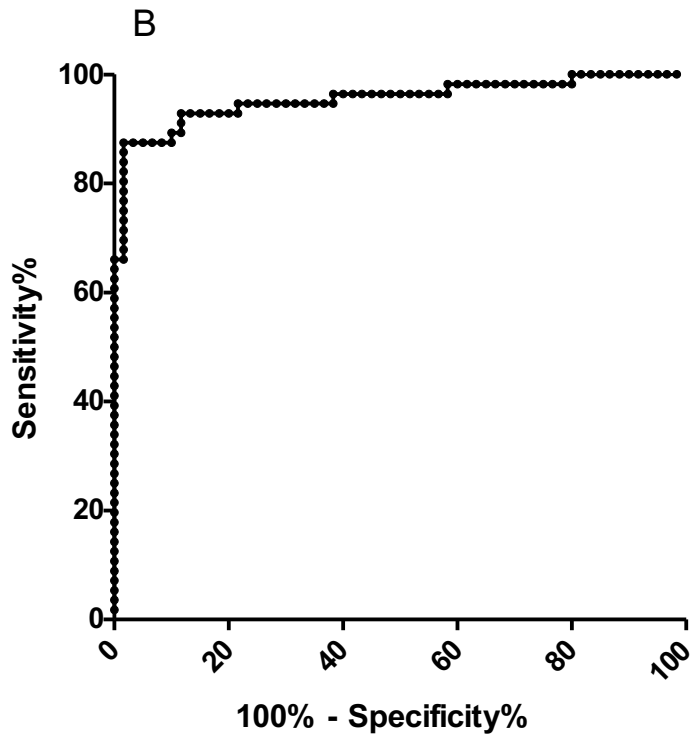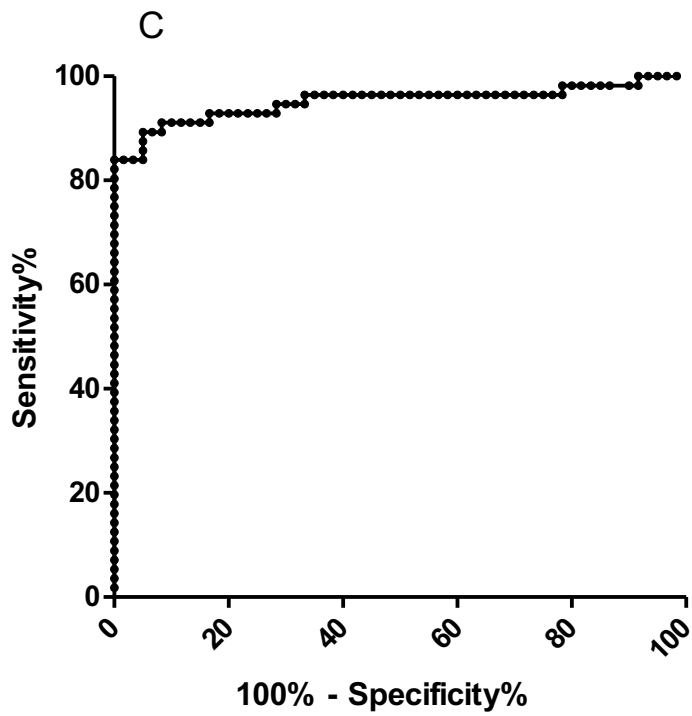

Supplemental figure 1; Receiver operating characteristic (ROC) curve analysis for SARS-CoV-2 antigens S1 (A), S ecto domain (B) and nucleocapsid protein (C).
